# Supplementary material for: Gut microbiota profiles of young South Indian children: Child sex-specific relations with growth
Source: PLOS journal article supplement (doi:10.1371/journal.pone.0251803), 2021-05-14

**S4 Fig. Scatter plots of association between fecal bacterial taxa and nutritional status of the study participants indicated by length-for-age (LAZ), weight-for-age (WAZ) and weight-for-length (WLZ) Z-scores and Hemoglobin and Age. Associations were determined using Spearman correlation ( $\rho$ ).  $p$  = raw p-value,  $q$  = fdr-adjusted p-value.**

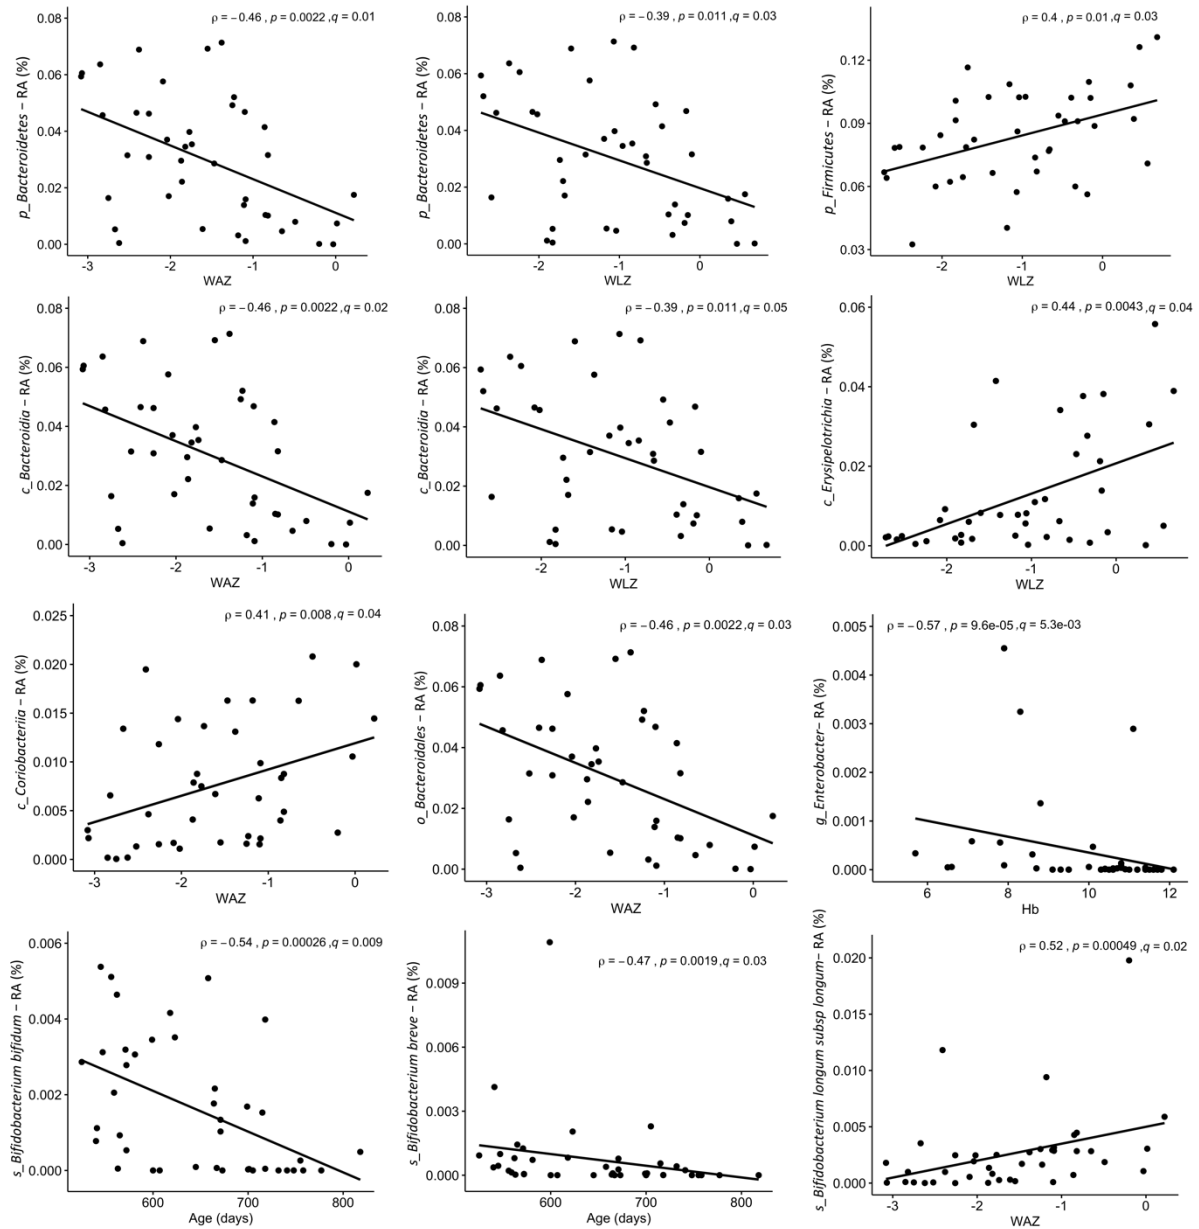

Supplement: S4 (10.1371/journal.pone.0251803.s004) [file journal.pone.0251803.s004]
